# Supplementary material for: An updated area-source seismogenic model (MA4) for seismic hazard of Italy
Source: Copernicus journal article supplement (doi:10.5194/nhess-22-2807-2022), 2022-08-26
Supplement: Supplementary file 2 [file nhess-22-2807-2022-supplement.zip]

| <i>AS</i> | <i>USD</i> | <i>LSD</i> | <i>Hypo1</i> | <i>Hypo2</i> | <i>P(hypo1)</i> | <i>P(hypo2)</i> |
|-----------|------------|------------|--------------|--------------|-----------------|-----------------|
| 1         | 0          | 22         | 10           |              | 1.00            |                 |
| 2         | 0          | 20         | 7            | 15           | 0.73            | 0.27            |
| 3         | 0          | 17         | 7            | 11           | 0.80            | 0.20            |
| 4         | 0          | 25         | 8            | 16           | 0.81            | 0.19            |
| 5         | 0          | 23         | 7            | 22           | 0.90            | 0.10            |
| 6         | 0          | 12         | 7            |              | 1.00            |                 |
| 7         | 0          | 21         | 6            | 12           | 0.76            | 0.24            |
| 8         | 0          | 24         | 8            | 22           | 0.86            | 0.14            |
| 9         | 0          | 15         | 8            |              | 1.00            |                 |
| 10        | 4          | 21         | 10           | 16           | 0.63            | 0.37            |
| 11        | 6          | 32         | 11           | 22           | 0.71            | 0.29            |
| 12        | 0          | 29         | 7            | 26           | 0.79            | 0.21            |
| 13        | 0          | 25         | 5            | 14           | 0.51            | 0.49            |
| 14        | 3          | 21         | 9            | 16           | 0.79            | 0.21            |
| 15        | 7          | 21         | 9            | 17           | 0.42            | 0.58            |
| 16        | 1          | 26         | 8            | 21           | 0.85            | 0.15            |
| 17        | 1          | 13         | 8            |              | 1.00            |                 |
| 18        | 0          | 17         | 9            |              | 1.00            |                 |
| 19shallow | 1          | 15         | 8            |              | 1.00            |                 |
| 19deep    | 15         | 30         | 23           |              | 1.00            |                 |
| 20shallow | 1          | 15         | 8            |              | 1.00            |                 |
| 20deep    | 15         | 30         | 23           |              | 1.00            |                 |
| 21        | 2          | 16         | 4            | 7            | 0.17            | 0.83            |
| 22        | 0          | 17         | 6            | 11           | 0.57            | 0.43            |
| 23        | 0          | 19         | 6            | 11           | 0.82            | 0.18            |
| 24        | 0          | 14         | 4            | 9            | 0.34            | 0.66            |
| 25shallow | 1          | 15         | 8            |              | 1.00            |                 |
| 25deep    | 15         | 30         | 23           |              | 1.00            |                 |
| 26        | 0          | 30         | 7            | 19           | 0.72            | 0.28            |
| 27        | 0          | 22         | 6            | 18           | 0.58            | 0.42            |
| 28        | 0          | 20         | 9            | 11           | 0.35            | 0.65            |
| 29        | 0          | 27         | 7            | 24           | 0.76            | 0.24            |
| 30        | 0          | 32         | 5            | 20           | 0.35            | 0.65            |
| 31        | 0          | 4          | 2            |              | 1.00            |                 |
| 32        | 0          | 20         | 8            | 16           | 0.87            | 0.13            |
| 33        | 0          | 17         | 7            | 15           | 0.92            | 0.08            |
| 34        | 0          | 27         | 6            | 18           | 0.45            | 0.55            |
| 35        | 0          | 20         | 7            | 16           | 0.66            | 0.34            |
| 36        | 0          | 27         | 6            | 16           | 0.60            | 0.40            |
| 37        | 0          | 28         | 7            | 18           | 0.45            | 0.55            |
| 38        | 0          | 25         | 10           |              | 1.00            |                 |
| 39        | 0          | 22         | 8            | 16           | 0.75            | 0.25            |
| 40        | 0          | 23         | 8            | 18           | 0.67            | 0.33            |
| 41        | 2          | 33         | 9            | 25           | 0.40            | 0.60            |
| 42        | 1          | 24         | 7            | 19           | 0.50            | 0.50            |
| 43        | 0          | 18         | 5            | 11           | 0.41            | 0.59            |
| 44        | 0          | 18         | 9            | 17           | 0.84            | 0.16            |
| 45        | 0          | 20         | 6            | 11           | 0.68            | 0.32            |
| 46        | 0          | 35         | 10           | 28           | 0.59            | 0.41            |
| 47        | 4          | 23         | 10           | 20           | 0.70            | 0.30            |
| 48        | 0          | 31         | 8            | 22           | 0.41            | 0.59            |
| 49        | 0          | 5          | 3            | 5            | 0.70            | 0.30            |
| 50        | 0          | 22         | 6            | 13           | 0.46            | 0.54            |

Supplement 1. “*AS*” = area source identification number; “*USD*” = upper seismogenic depth, round to integer number; “*LSD*” = lower seismogenic depth, round to integer number; “*Hypo1*” = peak of the unimodal(if *Hypo2* is empty) or highest peak of the bimodal (if “*Hypo2*” exists) distribution that best fits the data; “*Hypo2*” = second highest peak of the bimodal distribution that best fits the data; “*P(Hypo1)*” = probability of the *Hypo1* (if *Hypo2* is empty this value is 1); “*P(Hypo2)*” = probability of *Hypo2*.
