# Supplementary material for: An updated area-source seismogenic model (MA4) for seismic hazard of Italy
Source: Copernicus journal article supplement (doi:10.5194/nhess-22-2807-2022), 2022-08-26
Supplement: Supplementary file 4 [file nhess-22-2807-2022-supplement.zip]

| Bin | Io    | Mw   | Alps | Po Plain | Center | South | Islands | Sea  |
|-----|-------|------|------|----------|--------|-------|---------|------|
| 1   | 4-5   | 3.96 | 1900 | 1950     | 1950   | 1950  | 1950    | 2002 |
| 2   | 5     | 4.19 | 1900 | 1836     | 1900   | 1895  | 1950    | 2002 |
| 3   | 5-6   | 4.42 | 1871 | 1836     | 1871   | 1895  | 1871    | 2002 |
| 4   | 6     | 4.65 | 1871 | 1836     | 1871   | 1895  | 1871    | 1984 |
| 5   | 6-7   | 4.88 | 1871 | 1836     | 1871   | 1895  | 1871    | 1984 |
| 6   | 7     | 5.11 | 1700 | 1530     | 1650   | 1787  | 1700    | 1984 |
| 7   | 7-8   | 5.34 | 1700 | 1530     | 1650   | 1787  | 1700    | 1984 |
| 8   | 8     | 5.57 | 1530 | 1530     | 1650   | 1787  | 1700    | 1963 |
| 9   | 8-9   | 5.80 | 1530 | 1300     | 1530   | 1787  | 1530    | 1963 |
| 10  | 9     | 6.03 | 1300 | 1300     | 1530   | 1530  | 1530    | 1963 |
| 11  | 9-10  | 6.26 | 1300 | 1100     | 1300   | 1530  | 1300    | 1963 |
| 12  | 10    | 6.49 | 1300 | 1100     | 1300   | 1400  | 1300    | 1963 |
| 13  | 10-11 | 6.72 | 1300 | 1100     | 1300   | 1400  | 1300    | 1963 |
| 14  | 11    | 6.95 | 1300 | 1100     | 1300   | 1400  | 1300    | 1963 |
| 15  | 11-12 | 7.18 | 1300 | 1100     | 1300   | 1400  | 1300    | 1963 |

**Table 1. Completeness starting year for each  $I_0$ /Mw bin and macro-region defined according to the historical approach. The Mw value is the centre of each bin (0.23 Mw units).**

| Bin | Mw   | Alps | Po Plain | Center | South | Islands | Sea  |
|-----|------|------|----------|--------|-------|---------|------|
| A   | 3.85 | 1870 | 1870     | 1880   | 1960  | 1890    | 1960 |
| B   | 4.31 | 1870 | 1870     | 1880   | 1960  | 1890    | 1960 |
| C   | 4.77 | 1850 | 1870     | 1880   | 1870  | 1870    | 1960 |
| D   | 5.23 | 1810 | 1830     | 1790   | 1820  | 1680    | 1930 |
| E   | 5.69 | 1530 | 1690     | 1750   | 1760  | 1600    | 1930 |
| F   | 6.15 | 1490 | 1450     | 1580   | 1660  | 1500    | 1930 |
| G   | 6.61 | 1490 | 1320     | 1580   | 1600  | 1500    | 1930 |
| H   | 7.07 | 1490 | 1320     | 1580   | 1550  | 1500    | 1930 |
| I   | 7.53 | 1490 | 1320     | 1580   | 1550  | 1500    | 1930 |

**5 Table 2. Completeness starting year for each  $I_0$ /Mw bin and macro-region defined according to the statistical approach. In order to have enough data in each bin, we adopted a double width with respect to the historical approach and then applied the results to the same bins of Table 1. The Mw value is the centre of each bin (0.46 Mw units).**
