# Supplementary material for: An updated area-source seismogenic model (MA4) for seismic hazard of Italy
Source: Copernicus journal article supplement (doi:10.5194/nhess-22-2807-2022), 2022-08-26
Supplement: Supplementary file 5 [file nhess-22-2807-2022-supplement.zip]

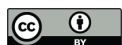

## *Supplement of*

# **An updated area-source seismogenic model (MA4) for seismic hazard of Italy**

**Francesco Visini et al.**

*Correspondence to:* Francesco Visini ([francesco.visini@ingv.it](mailto:francesco.visini@ingv.it))

- [nhess-22-2807-2022-supplement-title-page.pdf](#)
- [Supplement\\_1.pdf](#)
- [Supplement\\_2.pdf](#)
- [Supplement\\_3.pdf](#)
- [Supplement\\_4.pdf](#)
- [\\_\\_MACOSX](#)
  - [.\\_Supplement\\_1.pdf](#)
  - [.\\_Supplement\\_2.pdf](#)
  - [.\\_Supplement\\_3.pdf](#)
  - [.\\_Supplement\\_4.pdf](#)

The copyright of individual parts of the supplement might differ from the article licence.
