# Supplementary material for: An updated area-source seismogenic model (MA4) for seismic hazard of Italy
Source: Copernicus journal article supplement (doi:10.5194/nhess-22-2807-2022), 2022-08-26
Supplement: Supplementary file 6 [file nhess-22-2807-2022-supplement.zip]

| AS        | code | Prob  | strike | dip | rake |
|-----------|------|-------|--------|-----|------|
| 1         |      | 0.5   | 219    | 67  | -2   |
| 1         |      | 0.5   | 310    | 87  | -157 |
| 2         |      | 0.425 | 135    | 68  | 160  |
| 2         |      | 0.425 | 232    | 72  | 23   |
| 2         |      | 0.075 | 131    | 25  | 66   |
| 2         |      | 0.075 | 337    | 66  | 101  |
| 3         |      | 0.05  | 292    | 87  | -177 |
| 3         |      | 0.05  | 202    | 87  | -3   |
| 3         |      | 0.45  | 274    | 25  | 112  |
| 3         |      | 0.45  | 70     | 66  | 79   |
| 4         | -2   | 0.8   |        |     |      |
| 4         | -3   | 0.2   |        |     |      |
| 5         | -4   | 1     |        |     |      |
| 6         |      | 0.5   | 295    | 38  | -77  |
| 6         |      | 0.5   | 100    | 52  | -99  |
| 7         | -4   | 1     |        |     |      |
| 8         | -4   | 1     |        |     |      |
| 9         | -2   | 1     |        |     |      |
| 10        | -2   | 1     |        |     |      |
| 11        | -1   | 0.1   |        |     |      |
| 11        | -2   | 0.9   |        |     |      |
| 12        |      | 0.375 | 104    | 60  | -150 |
| 12        |      | 0.375 | 359    | 64  | -32  |
| 12        | -3   | 0.25  |        |     |      |
| 13        | -4   | 1     |        |     |      |
| 14        | -4   | 1     |        |     |      |
| 15        |      | 0.5   | 220    | 45  | 123  |
| 15        |      | 0.5   | 356    | 53  | 60   |
| 16        | -1   | 0.15  |        |     |      |
| 16        | -2   | 0.85  |        |     |      |
| 17        |      | 0.35  | 88     | 67  | -172 |
| 17        |      | 0.35  | 355    | 83  | -22  |
| 17        | -1   | 0.3   |        |     |      |
| 18        |      | 0.15  | 308    | 35  | -90  |
| 18        |      | 0.15  | 129    | 54  | -89  |
| 18        | -2   | 0.7   |        |     |      |
| 19shallow |      | 0.25  | 309    | 44  | -99  |
| 19shallow |      | 0.25  | 142    | 46  | -80  |
| 19shallow |      | 0.175 | 155    | 84  | -175 |
| 19shallow |      | 0.175 | 64     | 85  | -5   |
| 19shallow | -3   | 0.15  |        |     |      |
| 19deep    |      | 0.5   | 278    | 34  | 84   |
| 19deep    |      | 0.5   | 105    | 55  | 93   |
| 20shallow |      | 0.5   | 299    | 36  | 87   |
| 20shallow |      | 0.5   | 122    | 53  | 91   |
| 20deep    |      | 0.5   | 9      | 38  | 26   |
| 20deep    |      | 0.5   | 259    | 73  | 125  |
| 21        |      | 0.5   | 90     | 33  | 66   |
| 21        |      | 0.5   | 297    | 59  | 104  |
| 22        | -4   | 1     |        |     |      |
| 23        | -2   | 1     |        |     |      |
| 24        |      | 0.5   | 321    | 37  | -86  |
| 24        |      | 0.5   | 136    | 52  | -92  |
| 25shallow | -2   | 0.15  |        |     |      |
| 25shallow | -1   | 0.85  |        |     |      |
| 25deep    | -2   | 0.75  |        |     |      |
| 25deep    | -3   | 0.25  |        |     |      |
| 26        |      | 0.2   | 112    | 38  | 61   |
| 26        |      | 0.2   | 327    | 56  | 110  |
| 26        | -2   | 0.6   |        |     |      |
| 27        | -4   | 1     |        |     |      |
| 28        | -4   | 1     |        |     |      |
| 29        | -2   | 0.2   |        |     |      |
| 29        |      | 0.4   | 191    | 44  | 64   |
| 29        |      | 0.4   | 44     | 50  | 112  |
| 30        |      | 0.1   | 267    | 71  | -9   |
| 30        |      | 0.1   | 0      | 80  | -161 |
| 30        |      | 0.4   | 286    | 44  | 92   |
| 30        |      | 0.4   | 102    | 45  | 87   |
| 31        | -4   | 1     |        |     |      |
| 32        | -1   | 1     |        |     |      |
| 33        |      | 0.5   | 135    | 40  | -80  |
| 33        |      | 0.5   | 302    | 50  | -98  |
| 34        |      | 0.5   | 176    | 73  | 0    |
| 34        |      | 0.5   | 86     | 89  | 163  |

| AS | code | Prob  | strike | dip | rake |
|----|------|-------|--------|-----|------|
| 35 |      | 0.25  | 168    | 31  | -55  |
| 35 |      | 0.25  | 309    | 64  | -108 |
| 35 | -2   | 0.5   |        |     |      |
| 36 |      | 0.5   | 184    | 73  | 10   |
| 36 |      | 0.5   | 90     | 79  | 162  |
| 37 | -4   | 1     |        |     |      |
| 38 | -4   | 1     |        |     |      |
| 39 |      | 0.5   | 358    | 39  | -113 |
| 39 |      | 0.5   | 208    | 54  | -71  |
| 40 | -1   | 0.15  |        |     |      |
| 40 | -2   | 0.85  |        |     |      |
| 41 |      | 0.5   | 278    | 59  | 171  |
| 41 |      | 0.5   | 12     | 82  | 31   |
| 42 | -3   | 1     |        |     |      |
| 43 |      | 0.275 | 24     | 45  | 41   |
| 43 |      | 0.275 | 262    | 61  | 127  |
| 43 |      | 0.225 | 72     | 38  | 90   |
| 43 |      | 0.225 | 252    | 51  | 89   |
| 44 | -2   | 1     |        |     |      |
| 45 |      | 0.125 | 100    | 36  | -93  |
| 45 |      | 0.125 | 285    | 53  | -87  |
| 45 | -2   | 0.75  |        |     |      |
| 46 |      | 0.5   | 270    | 50  | 34   |
| 46 |      | 0.5   | 157    | 65  | 135  |
| 47 |      | 0.4   | 189    | 70  | -5   |
| 47 |      | 0.4   | 281    | 85  | -160 |
| 47 | -3   | 0.2   |        |     |      |
| 48 |      | 0.45  | 190    | 80  | 4    |
| 48 |      | 0.45  | 99     | 85  | 169  |
| 48 | -3   | 0.1   |        |     |      |
| 49 |      | 0.5   | 317    | 62  | 161  |
| 49 |      | 0.5   | 56     | 73  | 29   |
| 50 | -1   | 0.5   |        |     |      |
| 50 |      | 0.15  | 253    | 11  | -29  |
| 50 |      | 0.15  | 11     | 84  | -99  |
| 50 | -3   | 0.2   |        |     |      |

Supplement 2. “AS” = area source identification number; “code” = a code used to recall the style of faulting for AS where the summation procedure (Pondrelli et al., 2020) cannot be applied: -1 is for using normal style of faulting, -2 is for strike-slip, -3 for reverse, and -4 is for using all the three styles of faulting. “Prob” = probability of that style of faulting, note that some AS can have multiples styles of faulting (summation of Prob in each AS is 1). “strike, dip, rake” = parameters of the focal mechanisms obtained applying the summation procedure of Pondrelli et al. (2020).

Values of strike, dip rake and probability (probability has to multiplied by Prob, as given in the table above) used with codes -1 are:

0,60,-90,0.25  
90,60,-90,0.25  
180,60,-90,0.25  
270,60,-90,0.25

Values of strike, dip rake and probability (probability has to multiplied by Prob, as given in the table above) used with codes -2 are:

0,90,0,0.5  
90,90,0,0.5

Values of strike, dip rake and probability (probability has to multiplied by Prob, as given in the table above) used with codes -3 are:

0,30,90,0.25  
90,30,90,0.25  
180,30,90,0.25  
270,30,90,0.25

Values of strike, dip rake and probability (probability has to multiplied by Prob, as given in the table above) used with codes -4 are:

0,90,0,0.1  
90,90,0,0.1  
0,60,-90,0.1  
90,60,-90,0.1  
180,60,-90,0.1  
270,60,-90,0.1  
0,30,90,0.1  
90,30,90,0.1  
180,30,90,0.1  
270,30,90,0.1
